# Supplementary material for: Molecular Markers for Sensitive Detection of Plasmodium falciparum Asexual Stage Parasites and their Application in a Malaria Clinical Trial
Source: PubMed Central journal article supplement (PMC5508903; doi:10.4269/ajtmh.16-0893), 2017-04-24
Supplement: tpmd160893.SD1.pdf [file tpmd160893.SD1.pdf]

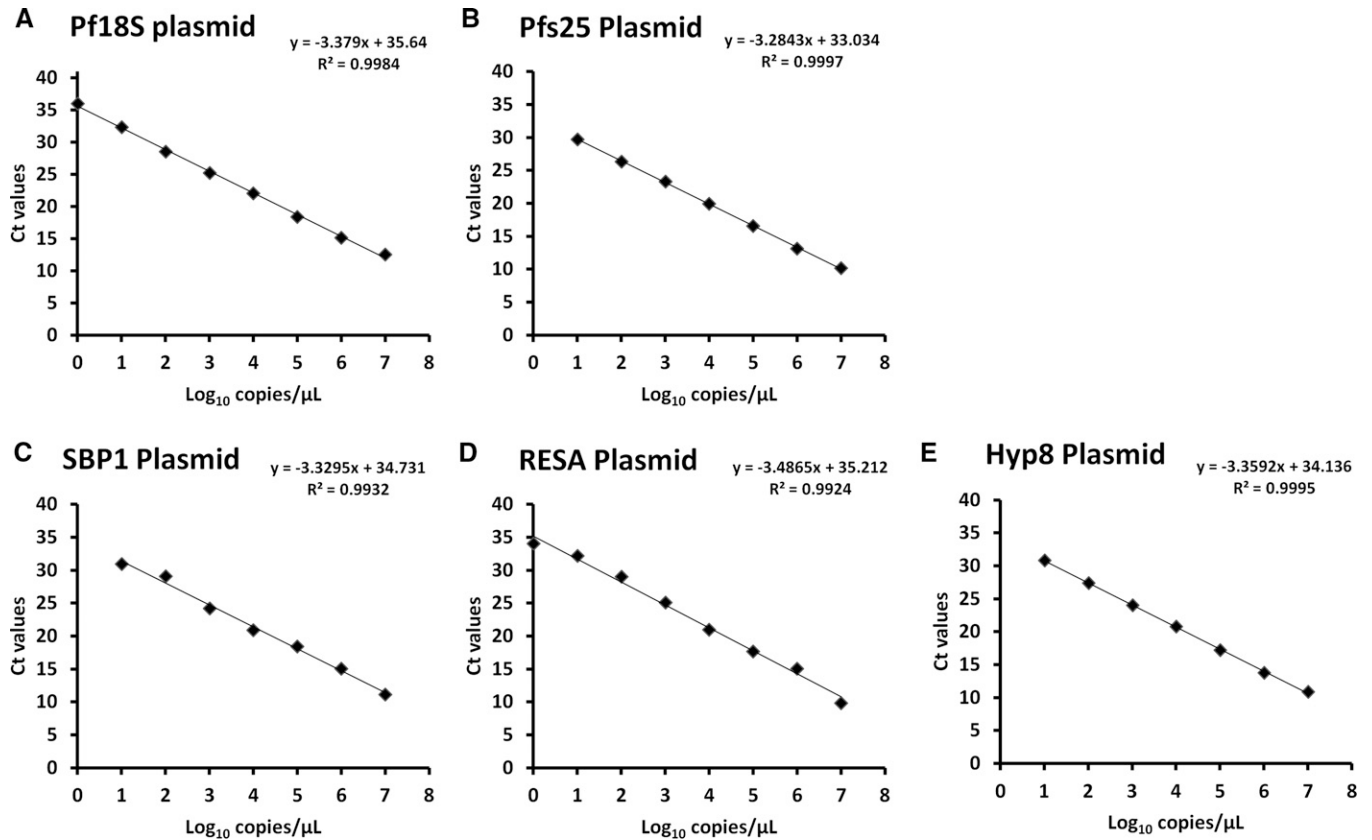

SUPPLEMENTAL FIGURE 1. Amplification curves. The linear regression for the amplification curves of (A) Pf18S DNA, (B) Pfs25, (C) SBP1, (D) RESA, and (E) Hyp8 to allow an assessment of polymerase chain reaction efficiency. Presented is the CT values (y axis) and the corresponding Log<sub>10</sub> transformed plasmid copy numbers per μL (x axis). Amplification efficiency was determined from the slope of the linear curve (indicated on the top right corners).

SUPPLEMENTAL TABLE 1  
 Selection of candidate marker

| GeneID      | Frequency | Intron | Beta-ring stages | Beta-mature gametocytes | Product description                                            | Rings/MG |
|-------------|-----------|--------|------------------|-------------------------|----------------------------------------------------------------|----------|
| PF11735c    | 6         | 1      | 11.04258         | 2.152472                | Ring-exported protein 1 (REX1)                                 | 5.130184 |
| PF10_0016   | 5         | 0      | 5.538458         | 1.0868                  | Acyl-CoA binding protein, isoform 2, ACBP2                     | 5.096117 |
| PFD1170c    | 24        | 1      | 8.970933         | 2.077469                | <i>Plasmodium</i> -exported protein (PHISTb), unknown function | 4.318204 |
| PFL2560c    | 2         | 1      | 8.053292         | 1.893178                | <i>Plasmodium</i> -exported protein, unknown function          | 4.253848 |
| MAL13P1.273 | 2         | 0      | 3.206335         | 0.784526                |                                                                | 4.086971 |
| PF08_0003   | 8         | 1      | 5.818946         | 1.461252                | Tryptophan/threonine-rich antigen                              | 3.982164 |
| PFD0095c    | 0         | 1      | 6.810232         | 1.906783                | <i>Plasmodium</i> -exported protein (PHISTb), unknown function | 3.571582 |
| MAL7P1.6    | 1         | 1      | 9.048624         | 2.575236                | <i>Plasmodium</i> -exported protein (hyp12), unknown function  | 3.513707 |
| MAL13P1.61  | 17        | 1      | 11.47698         | 3.29632                 | <i>Plasmodium</i> -exported protein (hyp8), unknown function   | 3.481757 |
| MAL7P1.171  | 16        | 1      | 8.620577         | 2.562053                | <i>Plasmodium</i> -exported protein, unknown function          | 3.364715 |
| PFB0095c    | 18        | 1      | 9.215172         | 2.805933                | Erythrocyte membrane protein 3                                 | 3.284175 |
| PF10_0022   | 18        | 1      | 5.936012         | 1.838252                | <i>Plasmodium</i> -exported protein (PHISTc), unknown function | 3.229161 |
| PFB0256w    | 12        | 0      | 3.34374          | 1.042435                |                                                                | 3.207625 |
| PFC0055w    | 11        | 1      | 2.23945          | 0.700442                | <i>Plasmodium</i> -exported protein (hyp13), unknown function  | 3.197195 |
| PF11_0503   | 13        | 1      | 9.200204         | 2.914172                | <i>Plasmodium</i> -exported protein (PHISTc), unknown function | 3.157056 |
| MAL7P1.170  | 1         | 1      | 11.19367         | 3.556579                | <i>Plasmodium</i> -exported protein, unknown function          | 3.147315 |

SUPPLEMENTAL TABLE 2  
Primer efficiency and limit of detection

| Target    | Slope   | Efficiency (%) | LOD (copies/ $\mu$ L) | $R^2$  | Cutoff CT values for positivity |
|-----------|---------|----------------|-----------------------|--------|---------------------------------|
| Pf18S DNA | -3.3790 | 98             | 1                     | 0.9984 | 36.0                            |
| Pfs25     | -3.2845 | 102            | 10                    | 0.9997 | 33.0                            |
| SBP1      | -3.3295 | 100            | 10                    | 0.9932 | 34.5                            |
| RESA      | -3.4865 | 94             | 1                     | 0.9924 | ND                              |
| Hyp8      | -3.3592 | 91             | 1                     | 0.9995 | ND                              |
| PHISTb    | ND      | ND             | ND                    | ND     | 35.0                            |
| REX1      | ND      | ND             | ND                    | ND     | 35.0                            |

LOD = limit of detection; ND = not determined; RESA = ring-infected erythrocyte surface antigen; REX1 = ring-exported protein 1; SBP1 = skeleton-binding protein 1. Primer efficiency and limit of detection were assessed by cloning polymerase chain reaction products of the respective primers into p-TOPO-TA vectors. Constructs were used as quantitative controls/1standards as well.

SUPPLEMENTAL TABLE 3  
Primer sequence

| Primer  | GeneID        | Direction | Sequence                      | Annealing temperature ( $^{\circ}$ C) | Reference |
|---------|---------------|-----------|-------------------------------|---------------------------------------|-----------|
| 18S DNA | PF3D7_1148600 | Forward   | GTAATTGGAATGATAGGAATTTACAAGGT | 60                                    | 21        |
|         |               | Reverse   | TCAACTACGAACGTTTTAACTGCAAC    |                                       |           |
| 18S RNA | PF3D7_1148600 | Forward   | TCCGATAACGAACGAGATCTTAAC      | 60                                    | 12        |
|         |               | Reverse   | ATGTATAGTTACCTATGTTCAATTTCA   |                                       |           |
| Pfs25   | PF3D7_1031000 | Forward   | GAAATCCCGTTTCATACGCTTG        | 60                                    | 12        |
|         |               | Reverse   | AGTTTTAACAGGATTGCTTGATCTAA    |                                       |           |
| SBP1    | PF3D7_0501300 | Forward   | GCAAAACAAGCCGTACATGTTG        | 60                                    | 14        |
|         |               | Reverse   | TTGCTAGGTAATATCCTTTTCTTTTCC   |                                       |           |
| RESA    | PF3D7_0102200 | Forward   | CAGCATATGGGTTTACTGGC          | 60                                    |           |
|         |               | Reverse   | TGGAAGTTCATCTTCTGGCGTACA      |                                       |           |
| REX1    | PF3D7_0935900 | Forward   | GCTCCCTTTATTCTTGTG            | 58                                    |           |
|         |               | Reverse   | CATTATCATTTCCCTTCC            |                                       |           |
| PHISTb  | PF3D7_0424600 | Forward   | GGATAGCAAGAATCTTAAGAAC        | 56                                    |           |
|         |               | Reverse   | AACATACGTTCAATAAGACAAC        |                                       |           |
| Hyp8    | Pf3D7_1301700 | Forward   | CTTAATAATGGAACCTTTAAGAAC      | 60                                    |           |
|         |               | Reverse   | GTGTAGATTGTTCTGTTTCGAC        |                                       |           |

RESA = ring-infected erythrocyte surface antigen; REX1 = ring-exported protein 1; SBP1 = skeleton-binding protein 1.
